# Supplementary material
Source: publisher site journal article supplement (https://www.dovepress.com/get_supplementary_file.php?f=377600.docx)
Supplement: Supplementary file 1 [file get_supplementary_file.php]

# *Supporting Information*

# Combined Verapamil-Polydopamine Nanoformulation Inhibits Adhesion Formation in Achilles Tendon Injury using Rat model

Shaoyan Li1, 2, #, Fengyan Gong1, 2, Zekun Zhou1, 2, #, Xu Gong1, 2

1 Department of Hand and Podiatric Surgery, Orthopedics center, The First Hospital of Jilin University, Changchun, People’s Republic of China. 130021.

2 Jilin Province key laboratory on tissue repair, reconstruction and regeneration, The First Hospital of Jilin University, Changchun, People’s Republic of China. 130021.


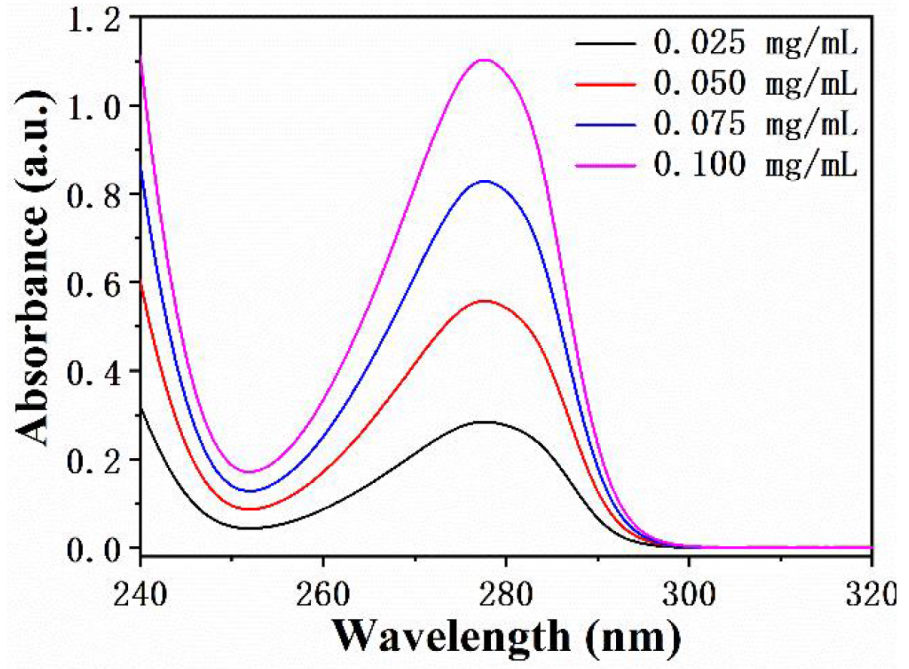


**Figure S1** The ultraviolet (UV) absorption spectrum of verapamil solution at the concentrations of 0.025, 0.050, 0.075 and 0.100 mg/mL.


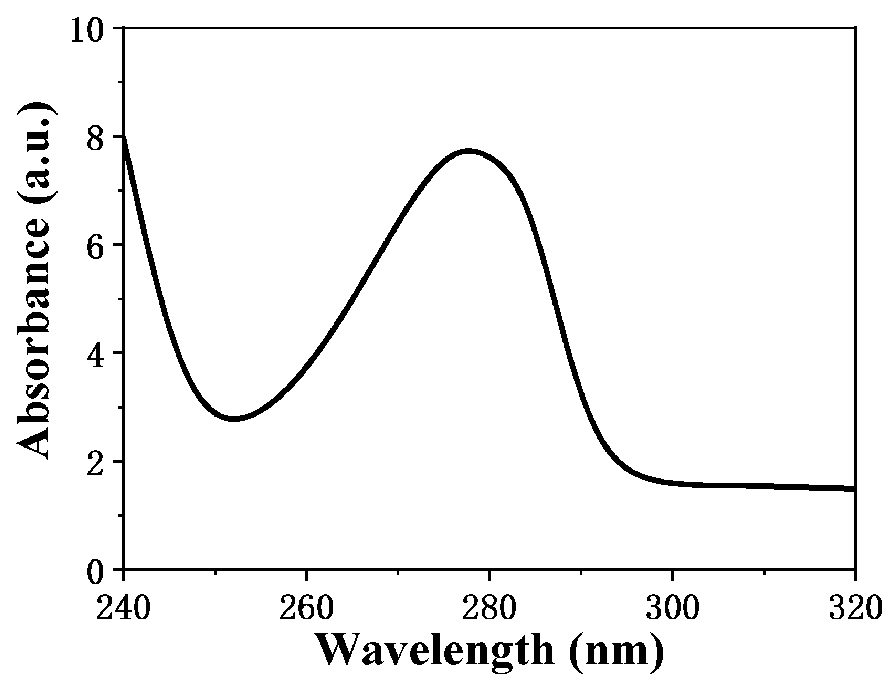


**Figure S2** The UV absorbance spectra of verapamil in the supernatant after drug loading when the content of VP-PDA NPs was 5 mg.

**Table S1** Blood biochemistry test.


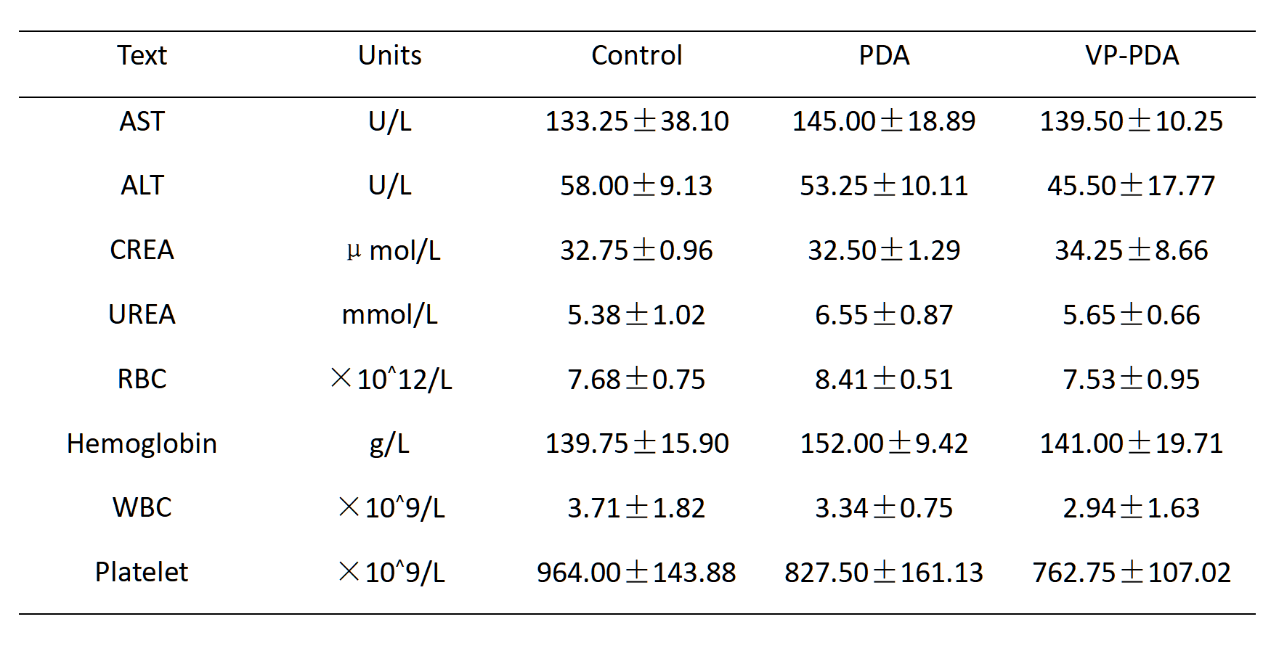


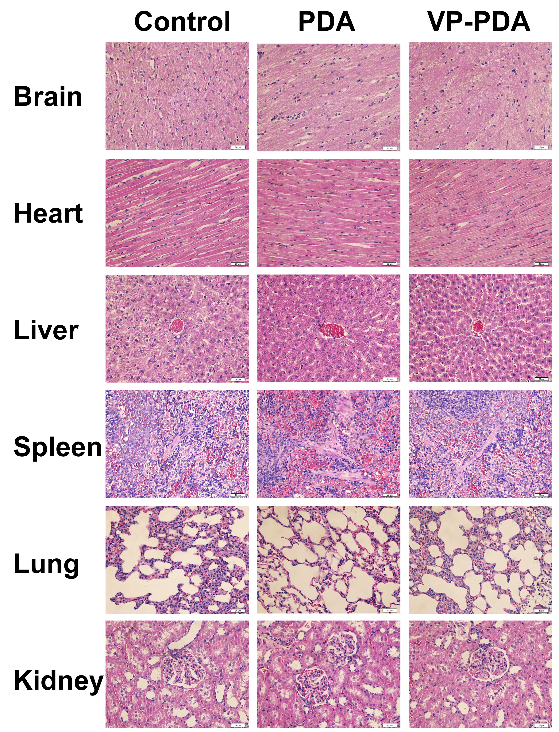


**Figure S3** H&E staining of brain, heart, liver, spleen, lung and kidney tissue sections.
